# Supplementary material for: Occurrence and path pollution of emerging organic contaminants in mineral water of Hranice hypogenic Karst
Source: Frontiers journal article supplement (doi:10.3389/fenvs.2024.1339818), 2024-02-05
Supplement: Table_1.XLSX [file Table_1.XLSX]

## Sheet: Gradient
Method 1
	volume percentage
time (min)	0.002 % formic acid and 0.2 mM NH4F (millipore)	volume percentage of methanol	flow rate (ml/min)
0.00	95	5	0.3
1.50	60	40	0.3
12.50	0	100	0.4
14.00	0	100	0.4
14.05	95	5	0.4
Method 2
	volume percentage
time (min)	0.002 % formic acid and 0.2 mM NH4F (millipore)	volume percentage of methanol	flow rate (ml/min)
0.0	70	30	0.3
8.0	0	100	0.4
9.0	0	100	0.4
9.1	70	30	0.4
