# Supplementary material for: Occurrence and path pollution of emerging organic contaminants in mineral water of Hranice hypogenic Karst
Source: Frontiers journal article supplement (doi:10.3389/fenvs.2024.1339818), 2024-02-05
Supplement: Table_2.XLSX [file Table_2.XLSX]

## Sheet:  IS
Direct injection - internal standards
RM	concentration	diluted in	producer	catalog number
Acetochlor D11	100 mg/l	acetone	Dr. Ehrenstorfer	DRE-XA10018100AC
Atrazine - D5	100 ug/ml	acetone	Dr. Ehrenstorfer	DRE-XA10330100AC
Atrazine-desisopropyl D5	100 ug/ml	acetone	Dr. Ehrenstorfer	DRE-XA10332100AC
Carbamazepin D10	100 ug/ml	methanol	HPC	677509
Clarithromycin D3	100 ug/ml	methanol	Neochema	18000-0246D-10ME1
DEET D7	100 ug/ml	acetonitrile	Neochema	15900-1317D-100AN
Dicamba D3	100 mg/l	acetone	Dr. Ehrenstorfer	DRE-XA12260100AC
Diclofenac D4	100 ug/ml	acetone	Dr. Ehrenstorfer	DRE-XA12537010AC
Dichlorprop D6	100 ug/ml	acetone	Dr. Ehrenstorfer	DRE-XA12510100AC
Diuron D6	100 ug/ml	acetonitrile	HPC	676314
Chlorpyrifos D10	100 ug/ml	acetone	Dr. Ehrenstorfer	DRE-XA11600100AC
Chlortoluron D6	100 ug/ml	acetone	Dr. Ehrenstorfer	11530100
Ibuprofen D3	100 ug/ml	acetonitrile	HPC Standards GmbH	676976
Isoproturon D6	100 ug/ml	acetone	Dr. Ehrenstorfer	14470100
Linuron D6	100 ug/ml	acetone	Dr. Ehrenstorfer	DRE-XA14640100AC
MCPA D6	100 ug/ml	acetone	Dr. Ehrenstorfer	DRE-XA14760200AC
Terbutryn - D5	100 ug/ml	acetone	Dr. Ehrenstorfer	DRE-XA17320100AC
VS 1, 20 ng/ml
Standard	concentration	Volume (ul)
VS A LCMS 1ug/ml	1 ug/ml	80
MeOH		3920
Dosage of internal standard: 1 ml sample + 10 ul VS 1
