# Supplementary material for: Occurrence and path pollution of emerging organic contaminants in mineral water of Hranice hypogenic Karst
Source: Frontiers journal article supplement (doi:10.3389/fenvs.2024.1339818), 2024-02-05
Supplement: Table_3.XLSX [file Table_3.XLSX]

## Sheet: SURF
						S - 1		S - 2			S - 3							S - 4		S - 5			S - 6			S - 7		S- 8					S - 9				S - 10				S - 11					S - 12		S - 13
Pharmaceuticals	Name of EOCs		GUS	LOD		11_12_2022	14_06_2023	31_03_2023	30_04_2023	14_06_2023	03_05_2022	19_07_2022	28_09_2022	11_12_2022	11_01_2023	31_03_2023	14_06_2023	11_01_2023	31_03_2023	11_01_2023	31_03_2023	14_06_2023	11_01_2023	31_03_2023	14_06_2023	31_03_2023	14_06_2023	03_05_2022	19_07_2022	28_09_2022	31_03_2023	14_06_2023	03_05_2022	19_07_2022	31_03_2023	14_06_2023	13_05_2022	28_09_2022	31_03_2023	14_06_2023	13_05_2022	28_09_2022	11_01_2023	31_03_2023	14_06_2023	11_01_2023	31_03_2023	11_01_2023	31_03_2023
NSAID	Diclofenac	ng/l		5	Prim						21.5	90.2	30	82.8	6	45.2	5.6												549					231					11.9
NSAID	Ibuprofen	ng/l		10	Prim							31.2	16.5	39	15.8	38.4	11.1						18.1							976												127
ATB	Azithromycin	ng/l		25; 200	Prim							79.7
ATB	Clarithromycin	ng/l		25	Prim						48.7	19.4				56.6
ATB	Sulfamethoxacol	ng/l		5	Prim			26.5		7.2	39	52.2		47.2		44.6	28.5																								11.4					5.4
ATB	Ttrimethoprim	ng/l		5	Prim		8.4				11.2					12.2
ATDe	Venlafaxine	ng/l		10	Prim							5.1		19.9
	SUM of prim PHARMACEUTICALS	ng/l				0	8.4	26.5	0	7.2	120.4	277.8	46.5	188.9	21.8	197	45.2	0	0	0	0	0	18.1	0	0	0	0	0	549	976	0	0	0	231	0	0	0	0	11.9	0	11.4	127	0	0	0	5.4	0	0	0
ATDe	O-desmethylvenlafaxin	ng/l		5	Met						22.1	13.7		42.7		34.8	18.8
	SUM of met PHARMACEUTICALS	ng/l				0	0	0	0	0	22.1	13.7	0	42.7	0	34.8	18.8	0	0	0	0	0	0	0	0	0	0	0	0	0	0	0	0	0	0	0	0	0	0	0	0	0	0	0	0	0	0	0	0
Pesticide Group Prim
Urea pesticides	Chlorotoluron	ng/l	2.01		Prim									11.6	10.3																			11.1
Tria_Dia_Pest	Atrazin	ng/l	2.57	10	Prim																		93.1	142	77.9	86.7	43.7
Tria_Dia_Pest	Simazin	ng/l	2.2	5	Prim																		6.6	5.4		30.8	12.7
Tria_Dia_Pest	Simetryn	ng/l	3.02	5	Prim									5.2
Tria_Dia_Pest	Terbutryn	ng/l	2.21	5	Prim									6.5																											8.6	66.4	15.6	8.8
Tria_Dia_Pest	Prometryn	ng/l	0.59	5	Prim
Tria_Dia_Pest	Terbutylazin	ng/l	2.19	5	Prim																													14.1
Tria_Dia_Pest	Propazin	ng/l	3.86	5	Prim																		6.4	5.2
Tria_Dia_Pest	Prometon	ng/l	6.31	5	Prim
Tria_Dia_Pest	Sucbumeton	ng/l	3.24	5	Prim
Tria_Dia_Pest	Hexazinon	ng/l	4.43	5	Prim
Triazol	Tetraconazole	ng/l	2.47	5	Prim
Triazol	Epoxiconazole	ng/l	2.04	5	Prim
Triazol	Tebuconazole	ng/l	1.86	5	Prim							2.5
Pyridazone	Chloridazon	ng/l	2.49	5	Prim	5.1																																14.3	8.5	5.3		9.4	6.7
Strobilurine	Azoxystrobin	ng/l	3.1	5	Prim
Strobilurine	Dimoxystrobin	ng/l	2.39	5	Prim
Chloracet_Pest	Dimethenamid	ng/l	2.41	5	Prim																													25.5
	SUM of prim PESTICIDES	ng/l				5.1	0	0	0	0	0	2.5	0	23.3	10.3	0	0	0	0	0	0	0	106.1	152.6	77.9	117.5	56.4	0	0	0	0	0	0	50.7	0	0	0	14.3	8.5	5.3	8.6	75.8	22.3	8.8	0	0	0	0	0
Pesticide Group Met
Tria_Dia_Pest	Desethylatrazin	ng/l	3.24	5	Met																		65.9	67.6	38.6	105	67										7.2	6.3				6.4
Tria_Dia_Pest	Atrazine-2-OH	ng/l	X	5	Met													9.9	6.5				78.6	69.1	42.5				6.5				21.8	14.7	13.9	37.5		17.3			29	30.7	26.6	17.8	7.6
Tria_Dia_Pest	Atrazin-DES-DI	ng/l	X	5	Met																		24.9	24.3	15.6	86.1	46									5.3				6.7
Tria_Dia_Pest	Tarbutilazin deseth	ng/l	3.07	5	Met																													46
Tria_Dia_Pest	Terbuthylazin-2-OH	ng/l	4.75	5	Met													5.4										27.1	27.7	25.3	23.3	15.8						6			24.5	32.9	32.5	27.1	9.4
Tria_Dia_Pest	Terbuthylazin-DE2OH	ng/l	x	5	Met																													5.4
Chloracet_Pest	Metazachlor OA	ng/l	5.18	5	Met	9.5		34.1		65.6	7.6	5.9	50.9	37.6	25.8	10.5		7.4		15													42.2	33	65.3		252	247	160	44.4	189	62.3	195	282	43.5
Chloracet_Pest	Metazachlor ESA	ng/l	6.18	10	Met	135	185	55.3		152	21.7		64.9	50.3	38	19.7	11.3	19.8	19.3	29.6	32.6	20.2						17.9	15.7		11.8	10.8	183		488		806	897	418	539	630	152	340	1400	195
Chloracet_Pest	Metolachlor OA	ng/l	6.88	15	Met
Chloracet_Pest	Metolachlor ESA	ng/l	7.22	10	Met	31.8	21.4	14			28.8	42.6	35.3	29.3	10.5	15.3	15.6			43	39.4	31.8	30.4	20.4	21.5	10.4		108	155	96.4	63.7	50.5											28.1	18		34.1	16.7
Chloracet_Pest	Alachlor ESA	ng/l	x	10	Met																							12.1	12.7
Chloracet_Pest	Acetochlor ESA	ng/l	3.73	10	Met	59.4	66																										28.4		31.6
Chloracet_Pest	Acetochlor OA	ng/l	2.49	5	Met																														5
Chloracet_Pest	Dimethenamid ESA	ng/l	6.18	5	Met	9				7.4																							42.3		49.3
Chloracet_Pest	Dimethenamid OA	ng/l	6.88	5	Met																													18.5	12.9
Chloracet_Pest	Dimethachlor ESA	ng/l	7.22	5	Met
Chloracet_Pest	Pethoxamid ESA	ng/l	x	5	Met
Pyridazone	Chloridazon DESPH	ng/l	5.46	5	Met	469	1180	15.5		22.5	31.4	68.1	6.3	23	5.7	16.5	26.9	213	194	35	53.9	26	33.7	28.3	15.3	57.6	12.2	218	246	159	163	128	266	263	275	121	2160	2230	2120	1650	1500	1150	903	1150	408	759	567	16.9	8.5
Pyridazone	Chloridazon DESPH ME	ng/l	4.39	5	Met	262	389	5.8		8	10.3	25.1		10.5		6.5	10.9	44.8	44.7	16.5	31.4	13.3				5.1		29	32.3	25	28	24.3	58.2	54.8	73.6	58.1	845	608	943	502	475	216	239	340	151	177	171	2.5	2.5
	SUM of met PESTICIDES	ng/l				975.7	1841.4	124.7	0	255.5	99.8	141.7	157.4	150.7	80	68.5	64.7	300.3	264.5	139.1	157.3	91.3	233.5	209.7	133.5	264.2	125.2	412.1	495.9	305.7	289.8	229.4	641.9	435.4	1014.6	221.9	4070.2	4011.6	3641	2742.1	2847.5	1650.3	1764.2	3234.9	814.5	970.1	754.7	19.4	11
	Bisphenol A	ng/l		5				144				54.1
	DEET	ng/l		100																																													141

## Sheet: GROUND
						G - 1						G - 2		G - 3			G - 4							G - 5				G - 6				G - 7			G - 8
Pharmaceuticals	Name of EOCs		GUS	LOD		03_05_2022	19_07_2022	28_09_2022	11_01_2023	31_03_2023	14_06_2023	11_12_2022	14_06_2023	03_05_2022	31_03_2023	14_06_2023	03_05_2022	19_07_2022	28_09_2022	11_12_2022	11_01_2023	31_03_2023	14_06_2023	19_07_2022	28_09_2022	11_01_2023	31_03_2023	03_05_2022	19_07_2022	28_09_2022	11_12_2022	11_01_2023	31_03_2023	14_06_2023	03_05_2022
NSAID	Diclofenac	ng/l		5	Prim		46.3					9.7					8.4	112						61.8				11.5	58.7		22.6
NSAID	Ibuprofen	ng/l		10	Prim			109											150		36.9				132				32.4	27.6	37.6
ATB	Azithromycin	ng/l		25; 200	Prim																								115
ATB	Clarithromycin	ng/l		25	Prim
ATB	Sulfamethoxacol	ng/l		5	Prim																											25.6
ATB	Ttrimethoprim	ng/l		5	Prim
ATDe	Venlafaxine	ng/l		10	Prim
	SUM of prim PHARMACEUTICALS	ng/l				0	46.3	109	0	0	0	9.7	0	0	0	0	8.4	112	150	0	36.9	0	0	61.8	132	0	0	11.5	206.1	27.6	60.2	25.6	0	0	0
ATDe	O-desmethylvenlafaxin	ng/l		5	Met
	SUM of met PHARMACEUTICALS	ng/l				0	0	0	0	0	0	0	0	0	0	0	0	0	0	0	0	0	0	0	0	0	0	0	0	0	0	0	0	0	0
Pesticide Group
Urea pesticides	Chlorotoluron	ng/l	2.01		Prim																														43.4
Tria_Dia_Pest	Atrazin	ng/l	2.57	10	Prim
Tria_Dia_Pest	Simazin	ng/l	2.2	5	Prim
Tria_Dia_Pest	Simetryn	ng/l	3.02	5	Prim																							6.2		7.7
Tria_Dia_Pest	Terbutryn	ng/l	2.21	5	Prim																									7.4					12.4
Tria_Dia_Pest	Prometryn	ng/l	0.59	5	Prim																									6.4					28.5
Tria_Dia_Pest	Terbutylazin	ng/l	2.19	5	Prim
Tria_Dia_Pest	Propazin	ng/l	3.86	5	Prim
Tria_Dia_Pest	Prometon	ng/l	6.31	5	Prim																									6
Tria_Dia_Pest	Sucbumeton	ng/l	3.24	5	Prim																									6.5
Tria_Dia_Pest	Hexazinon	ng/l	4.43	5	Prim
Triazol	Tetraconazole	ng/l	2.47	5	Prim																														142
Triazol	Epoxiconazole	ng/l	2.04	5	Prim
Triazol	Tebuconazole	ng/l	1.86	5	Prim
Chloracet_Pest	Dimethenamid	ng/l	2.41	5	Prim
Pyridazone	Chloridazon	ng/l	2.49	5	Prim		9.1	5.6	5.4										7.4	7.8	7.9										33.5
Strobilurine	Azoxystrobin	ng/l	3.1	5	Prim																									16.3	5.6
Strobilurine	Dimoxystrobin	ng/l	2.39	5	Prim
	SUM of prim PESTICIDES					0	9.1	5.6	5.4	0	0	0	0	0	0	0	0	0	7.4	7.8	7.9	0	0	0	0	0	0	6.2	0	50.3	39.1	0	0	0	226.3
Pesticide Group Met
Tria_Dia_Pest	Desethylatrazin	ng/l	3.24	5	Met																														25.3
Tria_Dia_Pest	Atrazine-2-OH	ng/l	X	5	Met	13.7	16.4	13.5	15.2	10.7	9.8			5.4														36	39.3	29.6	27.6				241
Tria_Dia_Pest	Atrazin-DES-DI	ng/l	X	5	Met																								6.5		5.2
Tria_Dia_Pest	Tarbutilazin deseth	ng/l	3.07	5	Met
Tria_Dia_Pest	Terbuthylazin-2-OH	ng/l	4.75	5	Met	39	29.1	32.1	25.2	22	17.1																	9.9	11.1	11.7					532
Tria_Dia_Pest	Terbuthylazin-DE2OH		x	5	Met																							8.1	7
Chloracet_Pest	Metazachlor OA	ng/l	5.18	5	Met	534	331	434	192	112	69.5	16.8	6.6	211	155	88	98.4	82.7	57.6	33.5	40.7	119	46	8	6.5		10.1	45.5	57	45.9	57.5	34			9.2
Chloracet_Pest	Metazachlor ESA	ng/l	6.18	10	Met	1050	962	905	544	444	348	120	45	203	242	149	859	430	362	187	264	884	490				10.6				165	42.1
Chloracet_Pest	Metolachlor OA	ng/l	6.88	15	Met																	53.8	22.2
Chloracet_Pest	Metolachlor ESA	ng/l	7.22	10	Met												44.1	58.5	56.7	37	56	97.4	57.8					34.5	29.2	44.2	33.9	38.7	13	15.2
Chloracet_Pest	Alachlor ESA	ng/l	x	10	Met
Chloracet_Pest	Acetochlor ESA	ng/l	3.73	10	Met							34.5					26.7	22.3	15.2		10	21.4													35.9
Chloracet_Pest	Acetochlor OA	ng/l	2.49	5	Met																									12.7
Chloracet_Pest	Dimethenamid ESA	ng/l	6.18	5	Met							6.5		17.3	10.7	8.5	79.9	36.2	31.7	13.3	30.8	60	34.5					76.4	60.2	48.2	54.4
Chloracet_Pest	Dimethenamid OA	ng/l	6.88	5	Met																	10.1	6.9					18.7	47	26.9	24.8
Chloracet_Pest	Dimethachlor ESA	ng/l	7.22	5	Met			6.3			5.7				6
Chloracet_Pest	Pethoxamid ESA	ng/l	x	5	Met
Pyridazone	Chloridazon DESPH	ng/l	5.46	5	Met	586	286	345	357	266	133	152	124	56.2	40.9	28.3	809	913	551	607	1490	623	462	11.7	12.2	11.3	12.9	420	265	685	1100	15.9	32.2	17.9	122
Pyridazone	Chloridazon DESPH ME	ng/l	4.39	5	Met	168	135	110	110	146	53	72.5	30	7.5	5.8		427	414	339	155	387	286	210					277	400	335	436	16.4	28.4	17.1	8.7
	SUM of met PESTICIDES					2390.7	1759.5	1845.9	1243.4	1000.7	636.1	402.3	205.6	500.4	460.4	273.8	2344.1	1956.7	1413.2	1032.8	2278.5	2154.7	1329.4	19.7	18.7	11.3	33.6	926.1	922.3	1239.2	1904.4	147.1	73.6	50.2	974.1
	Bisphenol A	ng/l	5																			655	493					268	335
	DEET	ng/l	100																									114

## Sheet: THERM
						T - 1			T- 2	T- 3		T- 4				T- 5			T - 6					T - 7						T - 8					T - 9						T- 10				T- 11
Pharmaceuticals	Name of EOCs		GUS	LOD		25_02_2022	19_07_2022	24_03_2023	11_12_2022	03_05_2022	19_07_2022	25_02_2022	03_05_2022	11_12_2022	24_03_2023	25_02_2022	11_12_2022	24_03_2023	15_04_2022	04_08_2022	12_10_2022	30_04_2023	14_06_2023	25_02_2022	15_04_2022	04_08_2022	12_10_2022	30_04_2023	14_06_2023	15_04_2022	04_08_2022	12_10_2022	30_04_2023	14_06_2023	25_02_2022	15_04_2022	04_08_2022	12_10_2022	30_04_2023	14_06_2023	25_02_2022	03_05_2022	11_12_2022	24_03_2023	25_02_2022	15_04_2022	04_08_2022	12_10_2022	30_04_2023
NSAID	Diclofenac	ng/l		5	Prim		39				47.4	5.7		5.3			5.1																			8.5		43.4			5.1		6.2
NSAID	Ibuprofen	ng/l		10	Prim				30.5						13
ATB	Azithromycin	ng/l		25; 200	Prim																			73.8
ATB	Clarithromycin	ng/l		25	Prim
ATB	Sulfamethoxacol	ng/l		5	Prim
ATB	Ttrimethoprim	ng/l		5	Prim
ATDe	Venlafaxine	ng/l		10	Prim
	SUM of prim PHARMACEUTICALS	ng/l				0	39	0	30.5	0	47.4	5.7	0	5.3	13	0	5.1	0	0	0	0	0	0	73.8	0	0	0	0	0	0	0	0	0	0	0	8.5	0	43.4	0	0	5.1	0	6.2	0	0	0	0	0	0
ATDe	O-desmethylvenlafaxin	ng/l		5	Met
	SUM of met PHARMACEUTICALS	ng/l				0	0	0	0	0	0	0	0	0	0	0	0	0	0	0	0	0	0	0	0	0	0	0	0	0	0	0	0	0	0	0	0	0	0	0	0	0	0	0	0	0	0	0	0
Pesticide Group					Prim
Urea pesticides	Chlorotoluron	ng/l	2.01	10	Prim																																				14.9	16.2	12.5
Tria_Dia_Pest	Atrazin	ng/l	2.57	5	Prim																																				5.7
Tria_Dia_Pest	Simazin	ng/l	2.2	5	Prim
Tria_Dia_Pest	Simetryn	ng/l	3.02	5	Prim
Tria_Dia_Pest	Terbutryn	ng/l	2.21	5	Prim
Tria_Dia_Pest	Prometryn	ng/l	0.59	5	Prim
Tria_Dia_Pest	Terbutylazin	ng/l	2.19	5	Prim
Tria_Dia_Pest	Propazin	ng/l	3.86	5	Prim
Tria_Dia_Pest	Prometon	ng/l	6.31	5	Prim
Tria_Dia_Pest	Sucbumeton	ng/l	3.24	5	Prim
Tria_Dia_Pest	Hexazinon	ng/l	4.43	5	Prim
Strobilurine	Dimoxystrobin	ng/l	2.39	5	Prim
Pyridazone	Chloridazon	ng/l	2.49	5	Prim
Triazol	Tetraconazole	ng/l	2.47	5	Prim
Triazol	Epoxiconazole	ng/l	2.04	5	Prim
Triazol	Tebuconazole	ng/l	1.86	5	Prim
Chloracet_Pest	Dimethenamid	ng/l	2.41	5	Prim
	SUM of prim PESTICIDES					0	0	0	0	0	0	0	0	0	0	0	0	0	0	0	0	0	0	0	0	0	0	0	0	0	0	0	0	0	0	0	0	0	0	0	20.6	16.2	12.5	0	0	0	0	0	0
Pesticide Group Met
Tria_Dia_Pest	Desethylatrazin	ng/l	3.24	5	Met																																				18.5	15.5	13.3	9.4	7.3	8.5		6.1	8.3
Tria_Dia_Pest	Atrazine-2-OH	ng/l	X	5	Met
Tria_Dia_Pest	Atrazin-DES-DI	ng/l	X	5	Met																																				14.3	13.1	10.6	7.2	10.9	5.3			5.5
Tria_Dia_Pest	Tarbutilazin deseth	ng/l	3.07	5	Met
Tria_Dia_Pest	Terbuthylazin-2-OH	ng/l	4.75	5	Met
Tria_Dia_Pest	Terbuthylazin-DE2OH		x	5	Met
Chloracet_Pest	Metazachlor OA	ng/l	5.18	5	Met																																								5.3
Chloracet_Pest	Metazachlor ESA	ng/l	6.18	10	Met		63												28.4	20.5	18.4	25.6	16.6	20.1	18.1	19	12.1	22.5	10.2	24.3	17.1	14.5	20.9	14.9	15.2	16.8	17.9		22.1	19.3					50.2	60.5	27.9	43.8	52
Chloracet_Pest	Metolachlor OA	ng/l	6.88	15	Met
Chloracet_Pest	Metolachlor ESA	ng/l	7.22	10	Met		123												10.7	11.9	12					12					11					11.3	14.9	11.7							12.5	14.6	11.2	18.6	15.4
Chloracet_Pest	Alachlor ESA	ng/l	x	10	Met														12.4											11.8					10.6	14.1	12.7	10.1			23.8	19.9	15.6	14.6	15.8	18.5	11.1	14.9	18.4
Chloracet_Pest	Acetochlor ESA	ng/l	3.73	10	Met
Chloracet_Pest	Acetochlor OA	ng/l	2.49	5	Met
Chloracet_Pest	Dimethenamid ESA	ng/l	6.18	5	Met
Chloracet_Pest	Dimethenamid OA	ng/l	6.88	5	Met
Chloracet_Pest	Dimethachlor ESA	ng/l	7.22	5	Met
Chloracet_Pest	Pethoxamid ESA	ng/l	x	5	Met
Pyridazone	Chloridazon DESPH	ng/l	5.46	5	Met	7.1	7	5.1	31.5	5.7	6	5.2	8.2	20	7	6.9	19.6	6	54.1	54.4	39.1	16.8	13.7	39.3	26.2	28.3	31	33.9	7.8	39	33.9	39	33	11.2	41	42.7	42.4	29.4	39.8	14.7	5.4	6.3	15.4	5.6	378	289	112	253	299
Pyridazone	Chloridazon DESPH ME	ng/l	4.39	5	Met				6.6					6.5			6.9		10.2	8.8	6	7.6		6			5.2	6.8		6.5	5.5		7.2		7.8	7.6	6.6		8.1	5.1			5.6		96.1	57.9	20.2	45.4	62.2
	SUM of met PESTICIDES					7.1	193	5.1	38.1	5.7	6	5.2	8.2	26.5	7	6.9	26.5	6	115.8	95.6	75.5	50	30.3	65.4	44.3	59.3	48.3	63.2	18	81.6	67.5	53.5	61.1	26.1	74.6	92.5	94.5	51.2	70	39.1	62	54.8	60.5	36.8	576.1	454.3	182.4	381.8	460.8
	Bisphenol A	ng/l		5			125																														242
	DEET	ng/l		100																		132
[truncated: 1 more columns]
